# Supplementary material for: RBM5-AS1 Is Critical for Self-Renewal of Colon Cancer Stem-like Cells
Source: Oxford University Press journal article supplement (doi:10.1158/0008-5472.can-15-1824), 2016-08-13
Supplement: 00085472can151824-sup-152169_1_supp_data_3548496_r92w0w.docx [file 00085472can151824-sup-152169_1_supp_data_3548496_r92w0w.docx]

**SUPPLEMENTAL FIGURE AND TABLE LEGENDS**

**Table S1. Long non-coding RNAs elevated in CCICs compared to their more differentiated counterpart.** Fold change increases and functions are indicated *as shown*.

**Figure S1. RNA abundance of *WNT*-ligand activated genes from sorted subpopulations of HT-29 cells enriched for the CD24 and CD44 stem cell surface antigens.** Custom IGV tracks were used to visualize the relative abundance of the primary RNA reads from Illumina HiSeq from samples of HT-29 cells gated for CD24 and CD44 enrichment**.**

**Figure S2. Ultraviolet photocrosslinking by PAR-CLIP identifies selective interactions of *RBM5-AS1*/*LUST* with β-catenin and TCF4.** Immunoprecipitation with antibodies against EZH2, β-catenin, TCF4 and CBX7 was performed, followed by isolation of the crosslinked and co-immunoprecipitated RNA in CaCo-2 cells by using Photoactivatable-Ribonucleoside-Enhanced Crosslinking and Immunoprecipitation (PAR-CLIP) application. The isolated RNA was converted into a cDNA library and measured by RT-qPCR**.**

**Figure S3. Mobility of *RBM5-AS1*/*LUST* transcript is retarded by -catenin and TCF4 from CaCo-2 cell nuclear extracts. A)** EMSA was performed using biotin labeled and unlabeled RNA species representing the full-length of *RBM5-AS1*/*LUST* transcript as shown. Nuclear extracts and antibodies used are indicated *above* the lanes. **B)** Direct binding to RNA was assessed with recombinant affinity purified full-length -catenin protein (catalogue number ab63175; AbCam). Essentially as described above the *RBM5-AS1* and sense *RBM5* RNA transcripts, as indicated, were labeled with biotin and used in EMSA studies to compare binding of  catenin to *RBM5-AS1* and *RBM5* sense RNAs.

**Figure S4. Abundance of *RBM5-AS1*/*LUST* and *AKR1B10* corresponds with mortality for patients with resected colon adenocarcinoma**. Public data sets were retrieved using R software analysis for the Cancer Genome Atlas datasets. Kaplan-Meier survival analysis was done in *R* using the ‘survival’ package (*n=187*).

**SUPPLEMENTAL MATERIALS AND METHODS**

*Flow-cytometry analysis and cell sorting*

For FACS analysis, cells were stained using the following concentrations, respectively: 0.1:10 for CD44 and 0.5:10 for CD24, CD133 and CD166. All experiments and analysis were performed as previously described ([1](#_ENREF_1),[2](#_ENREF_2)).

## *Human LncProfiler qPCR array*

LncProfilerTM qPCR array (System Biosciences) was performed according to the manufacturer’s instructions.

*RNA Electrophoretic Mobility Shift Assay (EMSA)*

The RNA EMSA experiments were performed essentially as described ([3](#_ENREF_3)). All RNA probes were gel-purified from a native polyacrylamide gel and eluted for EMSA reactions using 5μg of CaCo2 cell nuclear extract and 1μg of either -catenin (Bethyl Labs) or TCF4 antibodies (AbCam) for supershift analysis.

*Mouse xenograft studies with HT-29 colon adenocarcinoma cells*

Specific volume calculations of tumor sizes were made using the following calculations (V = w2 * l * π/6; with w as tumor width and “l” as the tumor length) . All experimental procedures were approved by the Icahn School of Medicine at Mount Sinai Institutional Animal Care and Use committee under protocol LA09-00445 under the guidelines approved for animal use by the NIH.

**SUPPLEMENTAL** **REFERENCES**

1. Leccia F, Nardone A, Corvigno S, Vecchio LD, De Placido S, Salvatore F, et al. Cytometric and biochemical characterization of human breast cancer cells reveals heterogeneous myoepithelial phenotypes. Cytometry A 2012;81(11):960-72.

2. Leccia F, Del Vecchio L, Mariotti E, Di Noto R, Morel AP, Puisieux A, et al. ABCG2, a novel antigen to sort luminal progenitors of BRCA1- breast cancer cells. Molecular cancer 2014;13:213.

3. Yap KL, Li S, Munoz-Cabello AM, Raguz S, Zeng L, Mujtaba S, et al. Molecular interplay of the noncoding RNA ANRIL and methylated histone H3 lysine 27 by polycomb CBX7 in transcriptional silencing of INK4a. Mol Cell 2010;38(5):662-74.
