# Supplementary material for: RBM5-AS1 Is Critical for Self-Renewal of Colon Cancer Stem-like Cells
Source: Oxford University Press journal article supplement (doi:10.1158/0008-5472.can-15-1824), 2016-08-13
Supplement: 00085472can151824-sup-152169_1_supp_data_3548598_p92yfp.docx [file 00085472can151824-sup-152169_1_supp_data_3548598_p92yfp.docx]

**Supplemental Table 1**

**Differentially expressed lncRNA**

| **Name** | **Fold Change** | **Function** |
| --- | --- | --- |
| HOXA6as | 18.3 | Unknown |
| 7SK | 12.6 | Transcription regulation |
| NEAT1 (family) | 9.5 | Assembly, maintenance and structural integrity of paraspeckles |
| 7SL | 8.1 | Scaffold SRP proteins |
| lincRNA-p21 | 7.5 | Repress many genes regulated by p53 |
| Tsix | 7.3 | Interacts with PRC2 complex |
| Jpx | 6.6 | Regulation of X Chr. Inactivation in mammals via activation of the XIst RNA |
| AntiPeg11 | 5.8 | Binds PRC2 |
| H19 upstream  conserved 1 &2 | 5.8 | Mesodermal enhancer |
| Kcnq1ot1 | 5.4 | Involved in epigenetic silencing of the Kcq1 imprinting control region |
| NDM29 | 4.8 | Neuroblastoma differentiation marker 9 |
| Hoxa11as | 4.6 | Unknown |
| LUST | 4.5 | Antisense to the putative tumor suppressor gene RBM5 |
| KRASP1 | 4.5 | Unknown |
| PRINS | 4 | Required for cell viability after serum starvation |
| Malat1 | 3.8 | Metastasis-associated lung adenocarcinoma transcript1 |
| IGF2AS (family) | 3.4 | Unknown |
